# Supplementary material for: Drinking to Cope: a Latent Class Analysis of Coping Motives for Alcohol Use in a Large Cohort of Adolescents
Source: Springer Nature journal article supplement (doi:10.1007/s11121-016-0652-5), 2016-04-30
Supplement: MOESM5 [file 10106154]

| *Table S5. Sensitivity Analysis with Inverse Probability Weighting: Predicting latent class membership using internalising disorders* | | | | | |
| --- | --- | --- | --- | --- | --- |
|  | *N* | Odds Ratios for Latent Classes  (Reference group: Rarely drinks to cope) | | | OmnibusTest (Wald) |
|  |  | Confidence motives | Low Mood motives | Generalised Coping motives |  |
| **Internalising disorders** |  |  |  |  |  |
| Depression diagnosis at age 17-18 | 3,478 |  |  |  | χ2 = 46.4, *df* =2, *p* < 0.001 |
| No |  | 1.00 ref | 1.00 ref | 1.00 ref |  |
| Yes |  | 1.46 [0.79 to 2.69] | 2.11 [1.06 to 4.19] | 6.64 [4.17 to 10.57] |  |
|  |  |  |  |  |  |
| Anxiety diagnosis at age 17-18 | 3,002 |  |  |  | χ2 = 42.0, *df* =2, *p* < 0.001 |
| No |  | 1.00 ref | 1.00 ref | 1.00 ref |  |
| Yes |  | 1.90 [1.13 to 3.18] | 2.26 [1.28 to 3.96] | 6.00 [3.88 to 9.22] |  |
|  |  |  |  |  |  |
