# Supplementary material for: Drinking to Cope: a Latent Class Analysis of Coping Motives for Alcohol Use in a Large Cohort of Adolescents
Source: Springer Nature journal article supplement (doi:10.1007/s11121-016-0652-5), 2016-04-30
Supplement: MOESM6 [file 10106154]

*Missing Data: Method for Sensitivity Analyses*

We used inverse probability weighting (IPW) to conduct sensitivity analyses and examine whether our results were likely to be biased. IPW is considered preferable for handling missing data in cases where an adequate multiple imputation (MI) model cannot be specified ([see Seaman and White, 2013](#_ENREF_48)). In our case, this method was utilised as the majority of the participants provided either all or none of the key measures included in our analysis so auxiliary information (such as would inform an MI) was sparse amongst non-responders. The IPW approach consists of using baseline information to construct a logistic model for whether or not participants are included in the substantive model of interest. Predicted probabilities from this logistic model are then converted into importance weights. For instance, if males had a 50% chance of being in the final model, then males would be given a weight of two.

In the current study a nested approach was adopted in which two prediction models were created. The first logistic model was for a binary indicator of attendance at the 17-18 year clinic (yes/no amongst the cohort of 13,988) and the second model predicted completion of drinking to cope questions at the clinic (yes/no amongst the sample of 4,881 who attended the clinic). Different covariates were used for these two prediction models to reflect the different likely reasons for missing response at these time-points. Covariates for the first model were a range of family adversity and socio-demographic indicators from maternal report collected between pregnancy and child age 5. For the second, candidates were proximal data on psychiatric symptoms, behavioural problems, prior reports of alcohol and drug use, and observer reports of participant discomfort, confusion or boredom during the clinic. The Hosmer–Lemeshow test was used to assess the fit of the two models of missingness. To perform the sensitivity analysis, cases were weighted by the combined inverse probability weightings from these two models, and results were compared with the primary (unweighted) analyses.

Of the original cohort of 13,988 participants, 4,881 attended the age 17-18 research clinic, and 3,957 completed the alcohol use and drinking to cope questions. The model to predict attendance vs absence at the age 17-18 included the following family predictors of non-attendance: car use, financial difficulties, housing adequacy, social network, parental police convictions, family relationship problems, maternal education and mental health symptoms, child’s sex (*n* = 11,847). The model to predict missing responses to alcohol questions among those who attended the age 17-18 clinic included the following family predictors of missingness: child’s sex, age, and depression symptoms at previous assessment points (*n =* 4,107).
